# 1 **Nanoscale Dynamics of Centromere Nucleosomes and the Critical** 2 **Roles of CENP-A**

3 Micah P. Stumme-Diers, Siddhartha Banerjee, Mohtadin Hashemi, Zhiqiang Sun, and Yuri L.  
4 Lyubchenko\*

5  
6 Department of Pharmaceutical Sciences, University of Nebraska Medical Center, 986025 Nebraska  
7 Medical Center, Omaha, NE 68198-6025

8 \*To whom correspondence should be addressed. Email: [ylyubchenko@unmc.edu](mailto:ylyubchenko@unmc.edu)

## 9 **ABSTRACT**

10 In the absence of a functioning centromere, chromosome segregation becomes aberrant, leading to  
11 an increased rate of aneuploidy. The highly specific recognition of centromeres by kinetochores  
12 suggests that specific structural characteristics define this region, however, the structural details and  
13 mechanism underlying this recognition remains a matter of intense investigation. To address this,  
14 High speed atomic force microscopy was used for direct visualization of the spontaneous dynamics of  
15 CENP-A nucleosomes at the sub-second time scale. We report that CENP-A nucleosomes change  
16 conformation spontaneously and reversibly, utilizing two major pathways: unwrapping, and looping of  
17 the DNA; enabling core transfer between neighboring DNA substrates. Along with these nucleosome  
18 dynamics we observed that CENP-A stabilizes the histone core against dissociating to histone  
19 subunits, unique from H3 cores which are only capable of such plasticity in the presence of  
20 remodeling factors. These findings have implications for the dynamics and integrity of nucleosomes at  
21 the centromere.

## 22 **INTRODUCTION**

23 The centromere is a specialized locus possessed by all chromosomes which aids in the segregation  
24 of sister chromatids during cell division. Failure to faithfully segregate chromosomes will result in  
25 aneuploidy, a hallmark of cancer (1). Furthermore, the presence of more than one centromere can  
26 lead to di-centric attachments, which can further result in chromosome breakage (2,3). A matter of  
27 outstanding importance is to investigate specific features of centromere derived nucleosomes which

28 might directly aid in its role as a substrate for microtubule attachment. Numerous studies over the  
29 past two decades have shown that the characteristic feature of centromeres is the presence of  
30 centromere protein A (CENP-A); a histone in nucleosomes that replaces the H3 histone of bulk  
31 chromatin. Therefore, it is widely accepted that CENP-A nucleosomes epigenetically define the  
32 centromere and form the foundation on which the kinetochore is built.

33 Structural characterization of CENP-A nucleosomes by X-ray crystallographic studies revealed that  
34 the exit/entry DNA segments of the nucleosomes (13 bp) are detached from the histone core, thus  
35 shortening the DNA segment wrapped around the core by 26 bp when compared to those that contain  
36 H3 (4,5). This deficit in DNA wrapped around CENP-A nucleosomes is further supported by  
37 enzymatic digestion experiments (6). Hence, one might ask how these differences in nucleosomal  
38 DNA lengths can be translated to the structural uniqueness of CENP-A containing nucleosomes *in*  
39 *vitro* and to what degree the replacement of H3 with CENP-A affects spontaneous nucleosome  
40 dynamics.

41 Several recent structural studies have demonstrated the degree to which H3 and CENP-A  
42 containing histone cores can tolerate deformation. Biophysical pulling assays revealed that CENP-A  
43 is slightly more amenable to disruption than corresponding H3 nucleosomes (7); a finding that agrees  
44 well with recent all-atom molecular dynamics (MD) simulation and FRET studies (8,9). Furthermore,  
45 using high-resolution NMR spectroscopy, remodeling factors were shown to increase the plasticity of  
46 H3 histone cores, indicating that they are capable of far greater flexibility than previously supposed  
47 (10).

48 We recently proposed a model that explains how the shortening of nucleosomal DNA can affect  
49 the structural properties of nucleosomes, their arrays, and eventually higher order chromatin  
50 structures that define the non-canonical properties of the centromere (11). Furthermore, we  
51 hypothesize that the flexible CENP-A nucleosomes are more dynamic, which contributes to the  
52 overall structural and dynamic properties required for a functioning centromere (8,12).

53 In this study, we performed direct imaging of CENP-A nucleosomes by high-speed time lapse  
54 atomic force microscopy (AFM), enabling us to visualize dynamics of the particles at a sub-second  
55 frame rate (11,13,14). Nucleosomes used for evaluation of DNA wrapping around the histone core  
56 were assembled on a DNA substrate containing a centrally positioned 601 motif (14-17). The broadly  
57 dynamic behavior of the DNA flanks was first revealed by analysis of AFM images acquired in

58 ambient conditions. Time-lapse imaging further identified dynamic pathways unique to CENP-A  
59 nucleosomes that were not previously observed for H3. The spontaneous unwrapping of DNA flanks  
60 can be accompanied by the reversible and dynamic formation of loops with sizes equivalent to a  
61 single wrap of DNA. Furthermore, CENP-A nucleosome cores are capable of reversible translocation  
62 over the DNA substrate; a process mediated through the formation of internal DNA loops along the  
63 nucleosome core particle. Finally, the transfer of the histone core from one DNA substrate to another  
64 was visualized. The data demonstrate that CENP-A nucleosomes are very dynamic, permitting it to  
65 distort freely and reversibly, which may play a critical role in centromere integrity during mitosis and  
66 replication.

67

## 68 **MATERIAL AND METHODS**

69 **Preparation of DNA Substrate and Nucleosome Reconstitution.** The DNA substrate used in  
70 nucleosome assembly contained the 147 bp 601 strong positioning sequence (18) flanked by plasmid  
71 DNA, 154 and 122 bp in length, generated using PCR with the pGEM3Z-601 plasmid (Addgene  
72 #26656; Fig. S1). Nucleosome assembly was achieved using the salt gradient dialysis method  
73 (19,20). Briefly, in 20  $\mu$ L of 1X TE buffer containing 2M NaCl, recombinant human CENP-A/H4  
74 tetramer's and H2A/H2B dimers purchased from EpiCypher (#16-0010 and #15-0311, respectively;  
75 Research Triangle Park, NC) were mixed with purified DNA substrate (final concentration of 100  
76 ng/ $\mu$ L) at a DNA/dimer/tetramer molar ratio of 1:2.2:1. Each assembly was loaded onto a Slide-A-  
77 Lyzer MINI dialysis unit (3,500 MWCO, Thermo Fisher Scientific) which was next dialyzed at 4°C  
78 while exchanging the 2M NaCl dialyzate from with one containing 2.5 mM NaCl (both at pH 7.5) at a  
79 rate of ~0.5 ml/min. After 70 hours, the reaction mixture was dialyzed against fresh low salt (2.5 mM  
80 NaCl) buffer for another hour. The reassembled nucleosome stock solution was stored at 4°C in the  
81 final dialysis buffer (2.5 mM NaCl, 1X TE, pH 7.5). The H3 octamer, CENP-A assembly mixture, and  
82 assembled CENP-A nucleosomes were run on a 12% SDS-PAGE gel (Fig. S2). H3 containing  
83 octamers were purchased from EpiCypher (#16-0001) and were assembled on the 601-substrate  
84 using the method just described.

85 **Atomic Force Microscopy (ambient conditions).** A 167  $\mu$ M solution of 1-(3-aminopropyl)- silatrane  
86 (APS) was used to modify freshly cleaved mica for 30 minutes at RT as previously described (21,22).

87 The nucleosome stock solution was diluted to 2 nM (based on DNA concentration) in a buffer  
88 containing 10 mM HEPES (pH 7.5) and 4 mM MgCl<sub>2</sub>. Immediately following nucleosome dilution, 7  $\mu$ L  
89 of sample was deposited on chilled (4°C) APS-mica and was rinsed with 1.5 mL of ultrapure H<sub>2</sub>O after  
90 a two-minute incubation followed by drying with a light flow of argon air. Prepared samples were  
91 stored under vacuum until imaged on a Multimode AFM/Nanoscope IIIa system using TESPA probes  
92 (Bruker Nano Inc). A typical image captured was 1.5 x 1.5  $\mu$ m in size with 512 pixels/line.

93 **High-Speed Atomic Force Microscopy.** A piece of mica, ~100  $\mu$ m thick, was punched into a circle  
94 of 2 mm diameter and glued on the stage of the HS-AFM where it was functionalized with 2.5  $\mu$ L of a  
95 500  $\mu$ M solution of APS for 30 minutes followed by a rinse with 20  $\mu$ L of ultrapure H<sub>2</sub>O. Nucleosome  
96 stock was diluted to 2 nM in buffer containing 10 mM HEPES (pH 7.5) and 4 mM MgCl<sub>2</sub> (imaging  
97 buffer) and 2.5  $\mu$ L of the diluted sample was deposited onto the APS-mica for 2 minutes followed by  
98 multiple rinses with a total of 20  $\mu$ L of imaging buffer. The sample surface was kept wet through the  
99 entire sample preparation process. Images were captured in the imaging buffer by high-speed AFM  
100 (RIBM) using an Olympus Micro Cantilever (BL-AC10DS- A2) that was EBD treated. Typical images  
101 acquired were 200 x 200 nm in size at a scan rate ranging from 0.2-0.4 sec/frame.

102 **Analysis and measurement parameters of nucleosomes imaged in air.** The samples deposited  
103 on APS mica and imaged by AFM in air were analyzed using Femtoscan Online for the length of each  
104 free DNA arm. The contour lengths of DNA particles not bound by histone proteins were first  
105 measured and a histogram with a bin size of 5 nm produced a single Gaussian fit with a center at 137  
106 nm (SD = 5.5 nm, R<sup>2</sup> = 0.99) which was established as the mean value of free DNA contour length.  
107 From this fit, a length conversion unit of 0.32 nm/bp was determined and used for subsequent  
108 calculations of DNA bp's free and wrapped around the histone core. For consistent measurements of  
109 nucleosome arm lengths, each free DNA arm was measured from the strand end to the core center  
110 as shown in Fig. 2B and the FWHM was later subtracted from the sum of the free arms to yield the  
111 length of unwrapped DNA. The resulting value was subtracted from the statistically determined 137  
112 nm length of the free DNA to obtain the length of wrapped DNA. The length of wrapped DNA was  
113 converted to bp using the length conversion unit established above. Gwyddion was used in obtaining  
114 height profile curves that were used to determine height, full width at half max height (FWHM), and  
115 volume measurements for nucleosome core particles. The three height and FWHM values for each

116 nucleosome were averaged and these values were used in calculation of the nucleosome core  
117 particle volume. The averaged curves were plotted as a histogram and fit with a Gaussian curve (Fig.  
118 S3).

119 **Analysis and measurement parameters of nucleosomes imaged by HS-AFM.** Movies captured  
120 with HS-AFM were initially analyzed using the FalconViewer extension to IgorPro software. Each  
121 image was flattened using either plane or line background removal depending on the background  
122 quality. Events of interest were saved as tiffs and analyzed further in Femtoscan Online and  
123 Gwyddion as done for the dry images. A moving median was plotted along with raw data for  
124 visualization of the global dynamics taking place. Images published had an additional band pass filter  
125 applied to lower noise; this filter was not applied to images used in analysis. OriginPro 2016 was used  
126 for all graphs both in text and supplement.

## 127 **RESULTS**

### 128 **DNA wrapping of CENP-A nucleosomes characterized by AFM**

129 Mononucleosomes containing human CENP-A were reconstituted on a 423 bp DNA substrate  
130 containing the 147 bp Widom 601 positioning sequence (18,19) between 122 and 154 bp flanks of  
131 non-specific plasmid DNA (Fig. 1A and Fig. S1). Static imaging by AFM in ambient conditions  
132 revealed centrally positioned nucleosomes, which are distinguishable from 'naked' DNA by the  
133 wrapped histone core which appears as a bright round feature flanked by two arms of unbound DNA  
134 (Fig. 1B). The contour lengths of all free DNA molecules were measured and plotted as a histogram  
135 (Fig. S3A). Fitting a Gaussian curve to the histogram produced an average at  $423 \pm 17$  bp. To  
136 determine the length of DNA wrapped in a nucleosome, the contour length of each free DNA arm was  
137 measured and subtracted from the 423 bp length of the 'naked' DNA. Each measurement was made  
138 from the end of the strand to the center of the core for consistent measurement and average full width  
139 at half max (FWHM) of three cross section height profiles of each core particle was subtracted from  
140 the sum of its respective arms (Fig. 1B). A histogram of the wrapped DNA yielded a bimodal  
141 Gaussian distribution with the first peak centered at  $120.6 \pm 20$  bp and a second peak with a center at  
142  $160.6 \pm 13$  bp which were determined to make up 66% and 34% of the total population, respectively  
143 (Fig. 1D). The population with a peak centered at  $120.6 \pm 20$  bp agrees with the value previously

144 reported (5). A histogram of the heights of nucleosomes produced a bimodal Gaussian distribution  
145 with peaks centered at  $2.1 \pm 0.16$  nm and  $2.5 \pm 0.17$  nm which were calculated to populate 36% and  
146 64% of total nucleosomes, respectively (Fig. 1E). Similar results were obtained for the nucleosome  
147 volumes (Fig. S3D). These results suggest that taller particles correspond to the population of  
148 nucleosomes with 120.6 bp wrapped DNA. A close inspection of nucleosomes with 160.6 bp of  
149 wrapped DNA revealed a heterogeneity in nucleosome core morphology. Strikingly, an unexpected  
150 observation was that a significant population of such CENP-A nucleosomes contain DNA looped out  
151 of the particle (Fig. 1F). As a control, mononucleosomes containing H3 were assembled on the 601  
152 substrate and were prepared for imaging under the same conditions as CENP-A (Fig S4A). The DNA  
153 wrapped by these particles was determined to be  $143.9 \pm 20$  bp which is in line with the expected  
154 value of 147 bp (Fig S4B). The contrast in dynamics between CENP-A and H3 nucleosomes,  
155 including the looping of the former, is further established below.

156

### 157 **Dynamics of CENP-A nucleosomes visualized by time-lapse AFM**

158 The rather broad distributions of all parameters (wrapped DNA, height, volume) of CENP-A  
159 nucleosomes on the 601 substrate obtained at ambient conditions suggests a highly dynamic  
160 behavior relative to H3. To directly characterize such dynamic events, we turned to time-lapse AFM,  
161 in which nucleosome samples are imaged in aqueous solution. Specifically, we used high-speed AFM  
162 which allows for direct observation of the nucleosomes at a sub-second image acquisition rate  
163 (13,14,23). Fig. 2A shows a few frames out of the 632 consecutive frames assembled as Movie S1.  
164 The selected area contained four CENP-A nucleosomes; the dynamics of which were captured  
165 simultaneously at a rate of 3.3 frames per second.

166 Every nucleosome in this dataset spontaneously unwraps and the dynamics were characterized by  
167 measuring the lengths of DNA arms. These measurements were made for each of the four particles  
168 across all 632 frames as presented in Fig. 2B and Fig. S5-7. The two shortest-lived particles, particles  
169 2 and 4, are initially wrapped less than the 121 bp mean value (Fig. 1D), with  $100 \pm 11$  and  $86 \pm 13$   
170 bp, respectively. Next, the partially unwrapped nucleosomes begin a wrapping process, achieving  
171 wrapped values of  $126 \pm 15$  bp and  $121 \pm 11$  bp for particles 2 and 4, respectively. The transient  
172 wrapping is followed by unwrapping of both particles until they become fully unwrapped after ~100  
173 frames (Fig. 2B; particles 2 and 4).

174 Particles 1 and 3 (Fig. 2B) demonstrate a dynamic behavior different from that of 2 and 4. Initially  
175 both nucleosome cores are wrapped to values close to the expected 121 bp and DNA dissociates  
176 from each of the cores gradually over the ~600 frames. Particle 1 begins with  $125 \pm 15$  bp of wrapped  
177 DNA for ~200 frames until it unwraps to  $105 \pm 26$  bp for ~200 frames. This is a process with multiples  
178 unwinding-rewinding step as is evident from the large width of the Gaussians approximated from the  
179 experimental histograms (see Fig. 2B). Unique from the other four nucleosomes, particle 1 never fully  
180 unwraps, instead rewrapping  $38 \pm 12$  bp around a smaller histone complex, where it remains stable  
181 for over 200 frames. Particle 3 begins wrapped with  $134 \pm 11$  bp, where it remains for over 400  
182 frames, until partially unwrapping ~30 bp of DNA to  $103 \pm 12.5$  bp, where it remains until it eventually  
183 fully unwraps (Fig. 2B).

184

### 185 **Dynamic formation of DNA loops**

186 As discussed above, AFM images of dry nucleosome samples with looped out nucleosomal DNA  
187 were identified (Fig. 1F). Given that looping out of DNA in chromatin is an issue of great biological  
188 importance (24-26), we next focused our attention on dynamics of this specific behavior. A few frames  
189 representing snapshots of this looping process were selected from Movie S2 and are shown in Fig.  
190 3A. These images visually illustrate that the loop grows gradually (frames 1 through 3), until it reaches  
191 a size of ~90 bp, as seen in frame 4. Next, the loop shrinks (frames 5 though 7) becoming again small  
192 (~20 bp) in frame 8. To characterize this process, images of all 100 frames were analyzed. It was  
193 done by contour length measurements of the looped DNA, height profile analysis of a line dissecting  
194 the apex of the loop and core, relative volume of the nucleosome core particle, and by changes in the  
195 DNA wrapped around the core via nucleosome arm contour measurements. These are plotted in Fig.  
196 3B-E. Contour length analysis of the loop (Fig. 3B and C) shows that its formation is reversible, as it  
197 dramatically changes size five times as seen on the loop cross sections and the loop size graph. The  
198 first two times the loop is formed, it grows to be ~15 bp until retightening around the core. Shortly  
199 after, the formation of the first of these two loops was found to be accompanied by a more than two-  
200 fold reduction in relative core volume where it remained for the subsequent looping events (Fig. 3C  
201 and E). This reduction in volume can be attributed to an approximately two-fold reduction in relative  
202 height of the nucleosome, while the width of the particle is seen to slightly increase, as also revealed  
203 by still images. Such a reduction in height can be explained in part to a loss of DNA from the histone

204 core due to looping, which greatly affects such measurements. The potential dissociation of H2A/H2B  
205 was not observed during the loop formation events. A height reduction of this magnitude which is  
206 never reached again despite shrinking of the loop, suggests that upon looping of the DNA, an internal  
207 rearrangement of the histone core has occurred. Unlike the first two loops formed, the third grows to a  
208 size of ~30 bp where it remains stable for eight frames until growing to ~90 bp. After five frames, the  
209 ~90 bp loop shrinks back to ~30 bp where it remains stable for over 20 frames.

210 Measurements of the DNA arm contour lengths lend insight to the mechanism by which the loop is  
211 forming; either by sliding of the DNA around the particle, or by falling away of the DNA from the core  
212 particle. As each of these loops forms, one of the DNA arms remains relatively stable, while the other  
213 is seen to decrease in size in unison with loop growth, suggesting that the loop is formed through the  
214 sliding of one of the DNA arms around the histone core. Since these arm lengths are used in the  
215 calculation of the wrapped DNA, a decrease in the length of the arm produces an artificially high value  
216 for bp of wrapped DNA, as was observed in AFM images in ambient conditions (Fig. 1D and F).

217

## 218 **Translocation and transfer of nucleosomes**

219 Previous studies have illustrated that the spontaneous unwrapping of nucleosomes is the major DNA  
220 dissociation event for H3 containing chromatin subunits; as was also observed for H3 nucleosomes  
221 assembled in this study (Movie S3 and Fig. S8). was also observed However, potential translocation  
222 (or, hopping), disruption of protein-protein contacts, or sliding of the histone core were not taken into  
223 consideration. In our previous time-lapse experiments we did visualize sliding, although it was limited  
224 to a relatively short range (14). Long-range sliding was only previously observed in the presence of  
225 the detergent, 3-[(3-Cholamidopropyl)dimethylammonio]-l-propanesulfonate (CHAPS), suggesting  
226 that such long range translocation of canonical nucleosomes is only possible in the presence of  
227 CHAPS (14,16). In contrast, CENP-A nucleosomes behave rather differently and are capable of long-  
228 range translocation. One of such events is shown in Fig. 4; this set of images (out of >500 assembled  
229 as Movie's S4 and S5) demonstrates that translocation takes place over 180 bp and that the process  
230 is bi-directional. The initial translocation takes place while the nucleosome is partly unwrapped, and  
231 the DNA moves in a corkscrew like motion around the core until it is at the end of the DNA substrate  
232 (Fig. 4A and Movie S4). The contour length of the 'shrinking' DNA arm was measured from its end, to  
233 the center of the core particle for 250 frames until the core had moved to the end of the DNA



234 substrate. This ‘forward’ translocation moves the DNA a total of ~180 bp but then appears to stall  
235 twice along the way. The first time is after the DNA moves ~25 bp and the second after it moves ~75  
236 bp. Lastly, it moves ~70 bp to the end of the DNA strand where it stays for few hundred frames (Fig.  
237 4A and B). Next, the DNA begins a reverse translocation of ~180 bp, back to its starting position (Fig.  
238 4B and Movie S5). Unlike the partly wrapped, corkscrew-like translocation, the reverse propagation  
239 stalls four times after moving the following distances in order of the translocation: ~60 bp, ~52 bp, ~40  
240 bp, ~25 bp (Fig. 4B). Similar translocation events were clearly observed for seven nucleosome  
241 particles.

242 Following the reverse translocation, the core particle was seen to transfer from one DNA molecule  
243 to another. A set of a few AFM images is shown as Fig. 5A; the full set of data can be seen in Movie  
244 S6. Initially, two nucleosomes are shown in the same scanning area. One nucleosome unwraps  
245 leaving a free DNA substrate (frame 2) which is later approached by the second nucleosome core  
246 particle (frame 3). This nucleosome core particle becomes associated simultaneously with two DNA  
247 molecules (frame 3 and 4), eventually transferring its core to the free DNA substrate. Schematically  
248 this process is shown in Fig. 5B.

249

## 250 **DISCUSSION**

251 In this study, we identified the dynamics of CENP-A nucleosomes by AFM techniques including high-  
252 speed time lapse imaging which revealed that CENP-A nucleosomes are capable of spontaneous  
253 unwrapping. As was reported previously for H3 nucleosomes and observed for the H3 control sample  
254 in this study, the spontaneous unwrapping of CENP-A nucleosomes was the eventual fate for all  
255 particles imaged (14-16). The simultaneous visualization of four nucleosomes as they unwrap (Fig. 2  
256 and Movie S5) illustrates that the phenomenon is common and that spontaneous dynamics are an  
257 intrinsic feature of all nucleosomes. Unlike H3 containing nucleosomes however, the unwrapping  
258 process/pathway for each CENP-A nucleosome is different; some of them unwrap rapidly like H3  
259 (e.g., particles 2 and 4), while others take a longer time via dynamic pathways (e.g., particles 1 and  
260 3). While a similar process was observed for canonical nucleosomes, we identified a number of  
261 dynamic behaviors unique to CENP-A nucleosome that are not found in the canonical nucleosome  
262 (14,17). Details of these features are discussed below.

263

## 264 **Nucleosome unwrapping via loop formation**

265 A distinct feature of CENP-A nucleosomes is the bimodal distribution of wrapped DNA as shown in  
266 Fig. 1*F*. The major peak is associated with wrapping ~120 bp DNA which makes ~1.5 turns around  
267 the CENP-A core compared with ~1.7 turns for canonical particles. This value is in line with recent  
268 crystallographic and Cryo EM studies (5,27). This difference was discussed and highlighted in our  
269 recent paper in which different models of nucleosomal arrays based on these differences in turn  
270 number were proposed, as supported by several studies (5,11,27). However, we identified a second  
271 population of nucleosomes with much shorter DNA flanks that were determined to have 160 bp of  
272 wrapped DNA which corresponds to as many as two full turns of DNA around the core. This  
273 population was found to contain approximately half as many particles as the main population and is  
274 unique to CENP-A nucleosomes, as such a bimodal distribution is not observed with canonical  
275 nucleosomes which have been shown both in this (Fig S4*B*) and previous studies to have a single  
276 population with ~1.7 DNA turns (15,28). High-resolution images in Fig. 1*F* revealed that the arm  
277 length deficit for a portion of the CENP-A population is not due to the elevated wrapping of DNA but  
278 rather to large segments of DNA that are looped out from the core. These looped nucleosomes are  
279 formed in such a way that the non-looped DNA, in contact with the core, consists of both 601  
280 sequence and an adjacent segment of non-specific DNA. The mechanism by which such loops  
281 assemble was next probed using time-lapse imaging in which (Fig. 3) we observed small loops are  
282 formed initially which continue to grow over time. Two processes contribute to the looping-out of DNA:  
283 First, a segment of DNA dissociates from the histone core, as evidenced by decrease the particle size  
284 (compare frames 1 and 4 in Fig. 3*A*). Second, a segment of the left flank moves around the core.  
285 Importantly, the segment remained bound to the histone core forming a stably existing loop. As it is  
286 seen from frames 5 through 8, the loop shrinks and this process is primarily due to moving of the left  
287 flank of the DNA substrate. The looping process is reversible due to the retained integrity of the  
288 CENP-A histone core.

289

## 290 **Translocation of histone core**

291 The spontaneous translocation of CENP-A histone cores is another dynamic property of CENP-A  
292 nucleosomes as illustrated in Fig. 4. In this example, the core moves over ~180 bp and then

293 eventually returns to the initial position. It stops at the end of the DNA substrate and has a few pauses  
294 along the translocation path. A similar pattern is observed for the reverse translocation. We used arm  
295 length measurements to estimate the DNA wrapping efficiency of the histone core during the  
296 translocation. Initially (frame 1 in Fig. 4A.), 104 bp of DNA are seen to wrap around the histone core,  
297 which is 16 bp shorter than for the mean value for CENP-A nucleosomes estimated in Fig. 1D.  
298 However, only a portion (~40 bp) of the DNA is in direct contact with the core, as the rest forms a  
299 looped structure. As translocation progresses, this loop structure changes in size, which results in  
300 fluctuations of the DNA segment in contact with the core. Once at the end of the DNA substrate, the  
301 loop unwraps, leaving ~40 bp of DNA still bound to the core. Spontaneously the distal end of DNA  
302 moved beyond the scan size, so determination of nucleosome size was further made through volume  
303 measurements. The results shown in Fig. S9 demonstrate that the nucleosome volume fluctuates, but  
304 generally remains constant, suggesting that during translocation the CENP-A core remains  
305 associated with ~40 bp. This is confirmed when the distal DNA end later reenters the frame and arm  
306 measurements provided the expected DNA contact value of ~40 bp.

307 Translocation has previously been observed for H3 nucleosomes and is therefore not unique to  
308 CENP-A (14). However, a distinction can be made when comparing the ranges of H3 translocation to  
309 that of CENP-A. H3 is limited to ~40 bp as the histone core quickly loses integrity and dissociates  
310 from DNA into its histone components (14). Ranges exceeding 100 bp were only achieved in the  
311 presence of CHAPS detergent, which like other detergents stabilizes the histone core from  
312 dissociation in dilute solutions of mononucleosomes (14,16). In this study, we revealed that CENP-A  
313 is capable of reversible long range translocation of ~180 bp in the absence of stabilizing  
314 factors/conditions. Critical to this ability is the stability of the CENP-A histone core upon loosening or  
315 unwrapping of DNA. Despite losing two-thirds of its contacts with DNA prior to translocation, the core  
316 remains whole and continues spontaneous interactions with and along the DNA substrate. As CENP-  
317 C has been shown to stabilize fully wrapped CENP-A nucleosomes, our results suggest that the  
318 unwrapped core is also stable and capable of maintaining dynamic contacts with DNA (9).

319

### 320 **Interstrand transfer of CENP-A core**

321 Transfer of the nucleosome core from one DNA substrate to another, as illustrated in Fig. 5, is  
322 another characteristic of CENP-A nucleosomes that has not been directly visualized before. Evidence

323 of interstrand nucleosome transfer was presented and discussed in landmark studies (29,30) and  
324 was recently demonstrated in a magnetic tweezers study (31). Furthermore, our results directly  
325 support such an ability. An interesting feature of the transfer process, as Fig. 5 illustrates, is that the  
326 transfer takes place between two DNA substrates. Note that exchange between the two DNA strands  
327 takes place with the CENP-A nucleosome core in contact with ~40 bp, as schematically shown in the  
328 cartoon (Fig. 5B). We would like to emphasize two important features of the CENP-A nucleosome  
329 core that makes such a transfer possible: the retained integrity of the histone core, and the long  
330 lifetime of the core-DNA complex after unwrapping. Again, these properties are unique to the stable  
331 CENP-A core and were not previously observed for canonical nucleosomes (14).

332 Overall, the experiments presented here reveal the highly dynamic properties of CENP-A  
333 nucleosomes that contribute to centromeric chromatin remodeling. Nucleosomes spontaneously  
334 undergo the unfolding process utilizing two major pathways: looping, and translocation along DNA,  
335 which enables the transfer of nucleosomes from one DNA to another. These spontaneous processes  
336 can be modulated by environmental conditions. Nucleosome remodeling can occur by different  
337 pathways with the necessary pathway for a specific genetic process (repair, replication, transcription)  
338 being promoted through recruitment of a specialized remodeling factor (32); for example, Chd1 can  
339 be used for sliding of nucleosomes (33). Our discoveries of the nanoscale dynamics intrinsic to  
340 CENP-A nucleosomes suggest that dynamic rearrangements of centromeric chromatin can occur in  
341 the absence of remodeling factors and at the same time facilitate dynamics of chromatin catalyzed by  
342 the remodeling factors. In addition to CENP-A nucleosome dynamics, we observed that CENP-A  
343 stabilizes nucleosome core particles against complete dissociation upon loosening or unwrapping of  
344 DNA. We speculate that this novel property of CENP-A might permit it to stay associated with H2A,  
345 H2B and H4, thereby permitting rapid nucleosome re-assembly following mitosis, transcription or  
346 replication induced eviction. Furthermore, the stabilization of fully wrapped CENP-A nucleosomes by  
347 CENP-C (9) along with the intrinsic stability of unwrapped CENP-A cores, may contribute to its  
348 longevity on the chromatin fiber, thus contributing to the cell cycle independent “memory” of  
349 centromeric chromatin over several cell cycles (34).

350

351

352

353 **FUNDING**

354 This work was supported by the National Science Foundation [grant MCB 1515346 to Y.L.L.]; the  
355 National Institutes of Health [grants GM096039 and GM118006 both to Y.L.L.]; and MH was partially  
356 supported by the Bukey Memorial Fellowship.

357 **CONFLICT OF INTEREST**

358 The authors declare no competing financial interests.

359 **ACKNOWLEDGEMENT**

360 We thank Yamini Dalal for the gift of recombinant histones, training, enthusiastic feedback, and critical  
361 review of the manuscript. We acknowledge Daniel Melters (Dalal lab) for thoughtful discussions and  
362 critical review of the manuscript. Author contributions: YLL and MSD designed the project; MSD, SB,  
363 MH, ZS performed AFM experiments and data analyses. All authors wrote and edited the manuscript.

364 **REFERENCES**

- 365 1. Gordon, D.J., Resio, B. and Pellman, D. (2012) Causes and consequences of aneuploidy in  
366 cancer. *Nat Rev Genet*, **13**, 189-203.
- 367 2. Kops, G.J., Weaver, B.A. and Cleveland, D.W. (2005) On the road to cancer: aneuploidy and  
368 the mitotic checkpoint. *Nat Rev Cancer*, **5**, 773-785.
- 369 3. Panigrahi, A.K. and Pati, D. (2009) Road to the crossroads of life and death: Linking sister  
370 chromatid cohesion and separation to aneuploidy, apoptosis and cancer. *Critical reviews in*  
371 *oncology/hematology*, **72**, 181-193.
- 372 4. Tachiwana, H., Kagawa, W. and Kurumizaka, H. (2012) Comparison between the CENP-A and  
373 histone H3 structures in nucleosomes. *Nucleus*, **3**, 6-11.
- 374 5. Tachiwana, H., Kagawa, W., Shiga, T., Osakabe, A., Miya, Y., Saito, K., Hayashi-Takanaka, Y.,  
375 Oda, T., Sato, M., Park, S.-Y. *et al.* (2011) Crystal structure of the human centromeric nucleosome  
376 containing CENP-A. *Nature*, **476**, 232-235.
- 377 6. Yoda, K., Ando, S., Morishita, S., Houchi, K., Hashimoto, K., Takeyasu, K. and Okazaki, T.  
378 (2000) Human centromere protein A (CENP-A) can replace histone H3 in nucleosome reconstitution  
379 in vitro. *Proceedings of the National Academy of Sciences*, **97**, 7266-7271.

- 380 7. Kim, S.H., Vlijm, R., van der Torre, J., Dalal, Y. and Dekker, C. (2016) CENP-A and H3  
381 Nucleosomes Display a Similar Stability to Force-Mediated Disassembly. *PLOS ONE*, **11**, e0165078.
- 382 8. Winogradoff, D., Zhao, H., Dalal, Y. and Papoian, G.A. (2015) Shearing of the CENP-A  
383 dimerization interface mediates plasticity in the octameric centromeric nucleosome. *Scientific Reports*,  
384 **5**, 17038.
- 385 9. Falk, S.J., Lee, J., Sekulic, N., Sennett, M.A., Lee, T.-H. and Black, B.E. (2016) CENP-C directs  
386 a structural transition of CENP-A nucleosomes mainly through sliding of DNA gyres. *Nat Struct Mol*  
387 *Biol*, **23**, 204-208.
- 388 10. Sinha, K.K., Gross, J.D. and Narlikar, G.J. (2017) Distortion of histone octamer core promotes  
389 nucleosome mobilization by a chromatin remodeler. *Science*, **355**.
- 390 11. Lyubchenko, Y.L. (2014) Centromere chromatin: a loose grip on the nucleosome? *Nat Struct*  
391 *Mol Biol*, **21**, 8-8.
- 392 12. Melters, D.P., Nye, J., Zhao, H. and Dalal, Y. (2015) Chromatin Dynamics in Vivo: A Game of  
393 Musical Chairs. *Genes*, **6**, 751-776.
- 394 13. Uchihashi, T. and Ando, T. (2011) In Braga, P. C. and Ricci, D. (eds.), *Atomic Force*  
395 *Microscopy in Biomedical Research: Methods and Protocols*. Humana Press, Totowa, NJ, pp. 285-  
396 300.
- 397 14. Miyagi, A., Ando, T. and Lyubchenko, Y.L. (2011) Dynamics of nucleosomes assessed with  
398 time-lapse high-speed atomic force microscopy. *Biochemistry*, **50**, 7901-7908.
- 399 15. Lyubchenko, Y.L. (2014) Nanoscale nucleosome dynamics assessed with time-lapse AFM.  
400 *Biophysical Reviews*, **6**, 181-190.
- 401 16. Menshikova, I., Menshikov, E., Filenko, N. and Lyubchenko, Y.L. (2011) Nucleosomes  
402 structure and dynamics: effect of CHAPS. *Int. J. Biochem. Mol. Biol*, **2**, 129-137.
- 403 17. Shlyakhtenko, L.S., Lushnikov, A.Y. and Lyubchenko, Y.L. (2009) Dynamics of nucleosomes  
404 revealed by time-lapse atomic force microscopy. *Biochemistry*, **48**, 7842-7848.
- 405 18. Lowary, P.T. and Widom, J. (1998) New DNA sequence rules for high affinity binding to  
406 histone octamer and sequence-directed nucleosome positioning1. *Journal of Molecular Biology*, **276**,  
407 19-42.
- 408 19. Guse, A., Fuller, C.J. and Straight, A.F. (2012) A cell free system for functional centromere and  
409 kinetochore assembly Authors. *Nature protocols*, **7**, 1847-1869.

- 410 20. Luger, K., Rechsteiner, T.J. and Richmond, T.J. (1999) Preparation of nucleosome core  
411 particle from recombinant histones. *Methods in enzymology*, **304**, 3-19.
- 412 21. Lyubchenko, Y.L. (2011) Preparation of DNA and nucleoprotein samples for AFM imaging.  
413 *Micron*, **42**, 196-206.
- 414 22. Shlyakhtenko, L.S., Gall, A.A., Filonov, A., Cerovac, Z., Lushnikov, A. and Lyubchenko, Y.L.  
415 (2003) Silatrane-based surface chemistry for immobilization of DNA, protein-DNA complexes and  
416 other biological materials. *Ultramicroscopy*, **97**, 279-287.
- 417 23. Katan, A.J., Vlijm R Fau - Lusser, A., Lusser A Fau - Dekker, C. and Dekker, C. Dynamics of  
418 nucleosomal structures measured by high-speed atomic force microscopy.
- 419 24. Kulić, I.M. and Schiessel, H. (2003) Nucleosome Repositioning via Loop Formation.  
420 *Biophysical Journal*, **84**, 3197-3211.
- 421 25. Pasi, M. and Lavery, R. (2016) Structure and dynamics of DNA loops on nucleosomes studied  
422 with atomistic, microsecond-scale molecular dynamics. *Nucleic Acids Research*, **44**, 5450-5456.
- 423 26. Bazett-Jones, D.P., Côté, J., Landel, C.C., Peterson, C.L. and Workman, J.L. (1999) The  
424 SWI/SNF Complex Creates Loop Domains in DNA and Polynucleosome Arrays and Can Disrupt  
425 DNA-Histone Contacts within These Domains. *Molecular and Cellular Biology*, **19**, 1470-1478.
- 426 27. Roulland, Y., Ouararhni, K., Naidenov, M., Ramos, L., Shuaib, M., Syed, S.H., Lone, I.N.,  
427 Boopathi, R., Fontaine, E., Papai, G. *et al.* (2016) The Flexible Ends of CENP-A Nucleosome Are  
428 Required for Mitotic Fidelity. *Mol Cell*, **63**, 674-685.
- 429 28. Luger, K., Mäder, A.W., Richmond, R.K., Sargent, D.F. and Richmond, T.J. (1997) Crystal  
430 structure of the nucleosome core particle at 2.8 Å resolution. *Nature*, **389**, 251-260.
- 431 29. Beard, P. (1978) Mobility of histones on the chromosome of simian virus 40. *Cell*, **15**, 955-967.
- 432 30. Stacks, P.C. and Schumaker, V.N. (1979) Nucleosome dissociation and transfer in  
433 concentrated salt solutions. *Nucleic Acids Research*, **7**, 2457-2467.
- 434 31. Brennan, L.D., Forties, R.A., Patel, S.S. and Wang, M.D. (2016) DNA looping mediates  
435 nucleosome transfer. *Nature Communications*, **7**, 13337.
- 436 32. Clapier, C.R. and Cairns, B.R. (2009) The Biology of Chromatin Remodeling Complexes.  
437 *Annual Review of Biochemistry*, **78**, 273-304.
- 438 33. McKnight, J.N., Tsukiyama, T. and Bowman, G.D. (2016) Sequence-targeted nucleosome  
439 sliding in vivo by a hybrid Chd1 chromatin remodeler. *Genome Res*, **26**, 693-704.

440 34. Ross, J.E., Woodlief, K.S. and Sullivan, B.A. (2016) Inheritance of the CENP-A chromatin  
441 domain is spatially and temporally constrained at human centromeres. *Epigenetics & Chromatin*, **9**,  
442 20.

443

#### 444 **FIGURES**

445 Begin on the following page (13) in the order that they appear.

446

#### 447 **SUPPLEMENTARY DATA**

448 Supplementary figures 1-9 can be found in the attached PDF labelled "Supplementary\_Data". Movies  
449 1-6 are attached as .mov files (Movie S1-S6) and their descriptions follow:

450 **Movie S1.** Relative dynamic behavior of four CENP-A nucleosomes imaged simultaneously. This  
451 demonstrates the consistent fate of all nucleosomes imaged with other dynamic events taking place  
452 prior to spontaneous unwrapping. Captured at a rate of 3.3 frames per second for a total of 632  
453 frames. Analysis of the dynamics of each particle are shown as Fig. 2 and Fig. S5-7.

454

455 **Movie S2.** Looping of DNA from CENP-A nucleosome. Prior to unwrapping of DNA from the histone  
456 core, a loop of DNA can spontaneously grow from the wrapped nucleosome and can then tighten  
457 back around the histone core. Captured at a rate of 2.7 frames per second for a total of 107 frames.  
458 Analysis of looping dynamics are shown as Fig. 3.

459

460 **Movie S3.** Spontaneous unwrapping of H3 nucleosome on 601 substrate. In line with previous  
461 studies, the H3 nucleosome spontaneously unwraps. Captured at a rate of 2.1 frames per second for  
462 a total of 167 frames. Analysis of unwrapping is shown as Fig. S4B.

463

464 **Movie S4.** Forward long range translocation of CENP-A histone core along DNA substrate. The core  
465 moves from the substrate center to the end until again translocating back to the center (Movie S5).  
466 Captured at a rate of 3.3 frames per second for a total of 284 frames. Further analysis is presented as  
467 Fig. 4.

468



469 **Movie S5.** Reverse long range Translocation of CENP-A histone core along DNA substrate. The  
470 same particle as shown in Movie S4 moves back to the position where it began in the middle of the  
471 substrate. Between the forward translocation in Movie S4 and this reverse translocation, the core  
472 remained at the very end of the DNA substrate (as it begins in this reverse translocation movie) and  
473 were therefor excluded from the movie. Captured at a rate of 3.3 frames per second for a total of 328  
474 frames. Further analysis is presented as Fig. 4.

475

476 **Movie S6.** Interstrand transfer of CENP-A histone core. Following the forward and reverse  
477 translocation (Movie S4 and Movie S5, respectively) the CENP-A core transfers to an adjacent DNA  
478 substrate. Captured at a rate of 3.3 frames per second for a total of 290 frames. Still frames of the  
479 transfer and a cartoon depicting this process are shown as Fig. 5A and B, respectively.

480

481

482

483

484

485

486

487

488

489

490

491

492

493

494

495

496

497

498

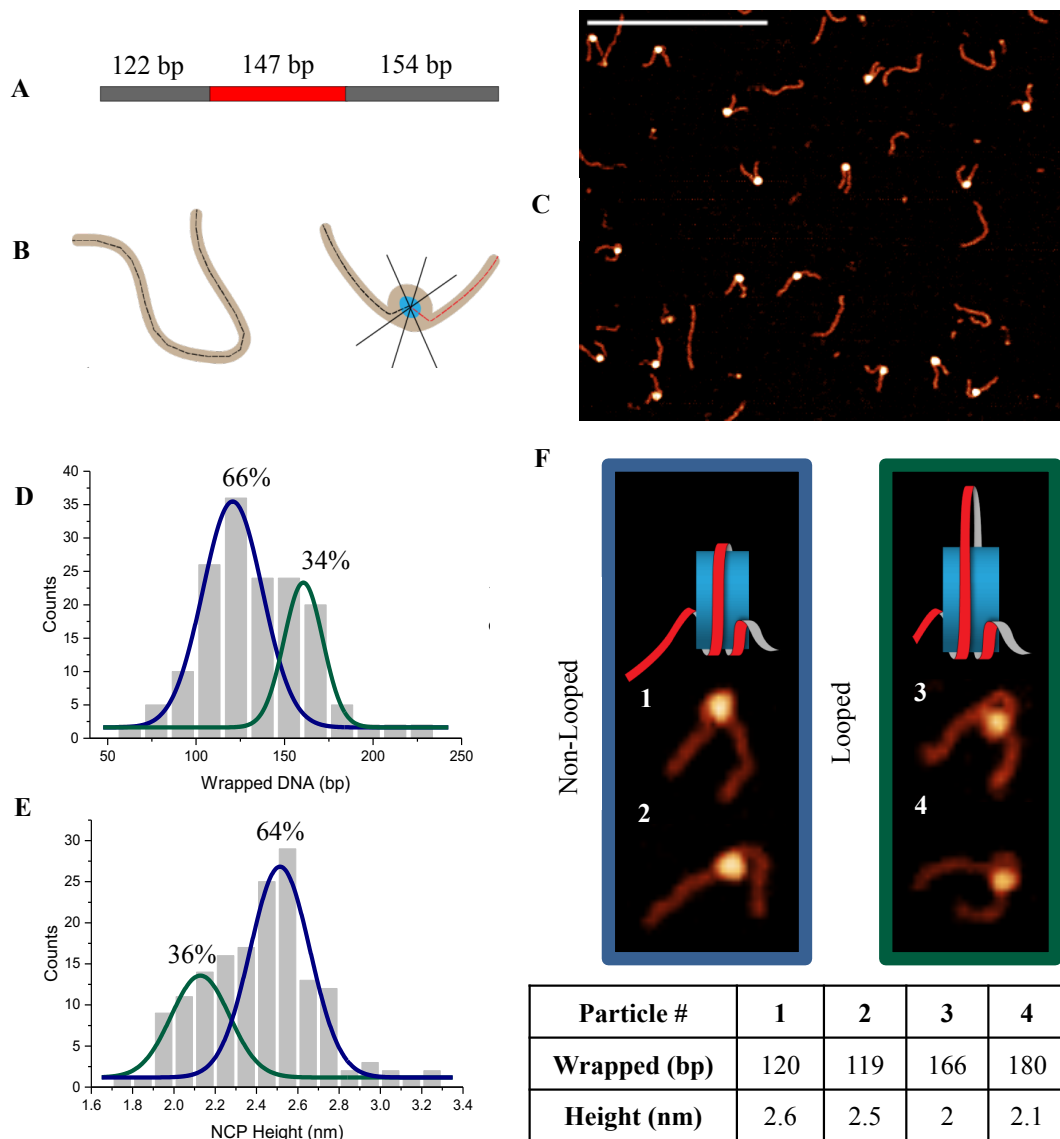

499

500 **Figure 1.** Ambient imaging of CENP-A nucleosomes reveals presence of looped nucleosome structure. (A)

501 Schematic of the DNA substrate containing the 147 bp 601 positioning sequence (red) with flanking 122 and 154

502 bp plasmid DNA (grey). (B) Diagram of how (left) the contour length of free DNA was measured and how (right)

503 each nucleosome 'arm' was measured from the end of the DNA to the center of the wrapped core (black and red

504 dashed); the width of the particle was then measured by three height profile cross sections at FWHM (black lines

505 through core). Half of this value was subtracted from each arm. (C) AFM image of reconstituted CENP-A

506 nucleosomes on an APS-mica surface (scale bar = 400 nm); each round white feature is a histone core with two

507 DNA 'arms'. Histograms fit with Gaussian curve of: (D) bp wrapped DNA with peaks centered at  $120.6 \pm 20$  bp

508 (blue) and  $160.6 \pm 13$  bp (green; bin size = 15 bp,  $R^2 = 0.99$ , 158 counts total). (E) nucleosome height with peaks

509 centered  $2.1 \pm 0.16$  nm (green) and  $2.5 \pm 0.17$  nm (blue; bin size = 0.1 nm,  $R^2 = 0.95$ , 158 counts total); Blue

510 curves correspond to non-looped nucleosome and green curves to looped. Percentages above each plot

511 represent the contribution of that conformation to the total nucleosome population based on the integral of the

512 curve. (F) Nucleosomes selected from each population seen in the height and wrapped DNA histograms. The  
513 color of each box represents the population shown by that color curve in (D and E). The height and wrapped DNA  
514 values for each of these particles is in the table below. The cartoon above the images is a visual of the non-  
515 looped and looped nucleosome structure.

516

517

518

519

520

521

522

523

524

525

526

527

528

529

530

531

532

533

534

535

536

537

538

539

540

541

542

543

544

545

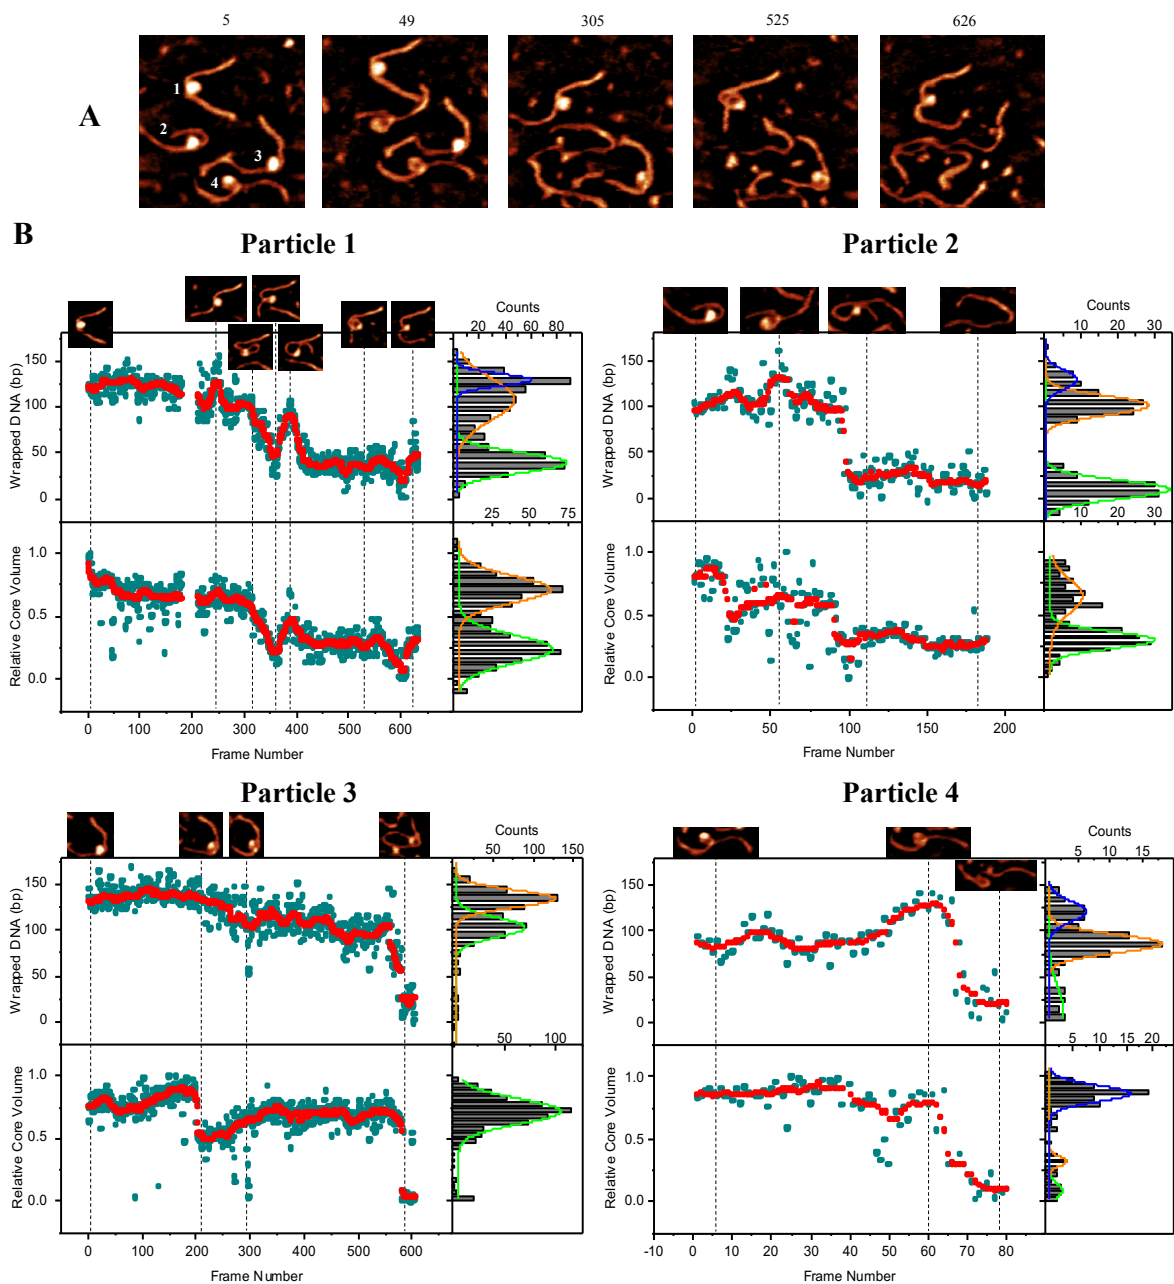

546

547 **Figure 2.** Visualization of CENP-A nucleosomes by HS-AFM reveals increased dynamic behaviors. (A) HS-AFM images  
 548 representing "snapshots" of the diverse dynamics of four nucleosomes across 632 consecutive frames captured at a rate of  
 549 3.3 frames/sec as can be seen in Movie S1. The frame number corresponding to the time at which each frame was captured is  
 550 above each frame and the four particles are referenced according to their assigned number in the first image. Each image is  
 551 200nm x 200 nm. (B) Analysis of the wrapped DNA (bp) and relative core volume (normalized 0 to 1) as a function of time. Raw  
 552 data is shown as cyan circles. Moving median ( $i \pm 5$ ; red) of the raw data makes the overall dynamic trends clear. The raw data  
 553 from each particle was plotted as a histogram and fit by a Gaussian curve with centers at the following values where error is  
 554 represented by std. dev. of the curve: Particle 1; wrapped DNA =  $125 \pm 15$ ,  $105 \pm 26$ ,  $38 \pm 12$  bp ( $R^2 = 0.99$ ), volume =  $0.67 \pm$   
 555  $0.1$ ,  $0.29 \pm 0.1$  ( $R^2 = 0.95$ ), each histogram total count = 598. Particle 2; wrapped DNA =  $126 \pm 15$ ,  $100 \pm 11.4$ ,  $21 \pm 12.5$  bp ( $R^2$   
 556 =  $0.98$ ), volume =  $0.64 \pm 0.15$ ,  $0.30 \pm 0.08$  ( $R^2 = 0.90$ ), each histogram total count = 188. Particle 3; wrapped DNA =  $134 \pm 11$ ,

557  $103 \pm 12.5$  bp ( $R^2 = 0.99$ ), volume =  $0.72 \pm 0.11$  ( $R^2 = 0.96$ ), each histogram total count = 605. Particle 4; wrapped DNA =  
558  $121.4 \pm 11$ ,  $86.7 \pm 13$ ,  $17.1 \pm 15$  bp ( $R^2 = 0.99$ ), volume =  $0.87 \pm 0.06$ ,  $0.32 \pm 0.04$ ,  $0.09 \pm 0.06$  ( $R^2 = 0.88$ ), each histogram total  
559 count = 79. Bin size for wrapped DNA = 10 bp and for relative core volume = 0.05. Total measurements made for analysis of  
560 these particles exceeds 15,000.

561

562

563

564

565

566

567

568

569

570

571

572

573

574

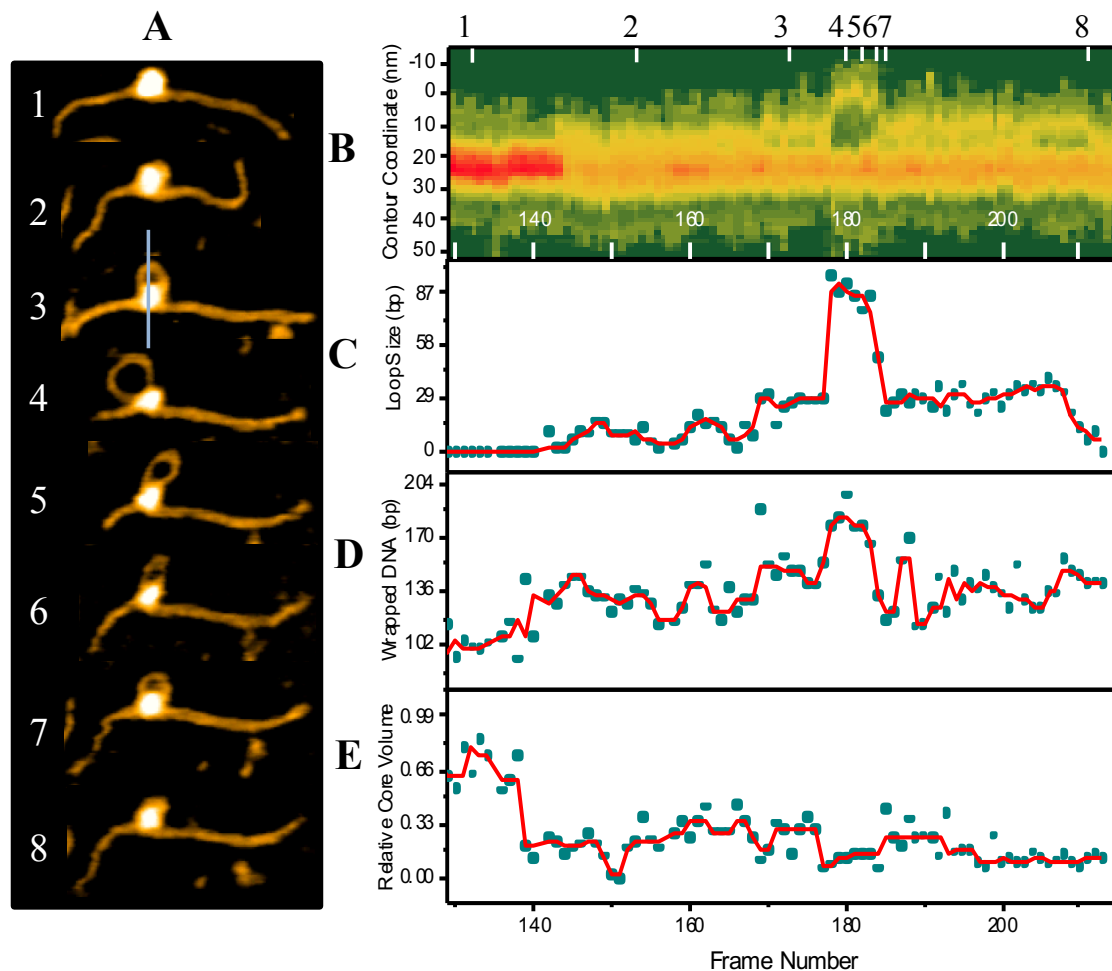

575

576

577 **Figure 3.** Spontaneous looping of CENP-A nucleosomes visualized by high speed AFM. (A) Images representing

578 stages of the looping of DNA from the nucleosome complex were selected from Movie S2; numbers (1-8)

579 correspond to the location of the frames (A) in the time trajectory. The line in image three shows how height

580 profile cross sections were measured to obtain plot (B); this represents the cross sections as a function of frame

581 number where the maximum height of the core is aligned for each cross section. Deviations in the upper yellow

582 line make clear the dynamic nature of this looped complex. The reduction in height shown as a transition from red

583 to yellow immediately prior to loop formation at approx. frame 140 suggests a rearrangement of the histone core

584 as the DNA loosens around it for loop formation (C) A plot of loop size as a function of time shows the dynamic

585 growth and shrinking of the loop. (D) Wrapped DNA (bp) was determined by arm length measurements which

586 revealed that changes in arm do contribute to the formation of the loop. (E) The core volume was found to

587 decrease by two times initially which is largely due to a reduction in height. Raw data is represented as cyan

588 circles, and the moving median by a red line. In total, looping was observed for a total of 10 nucleosomes from

589 the 52 particles imaged.

590

591 \

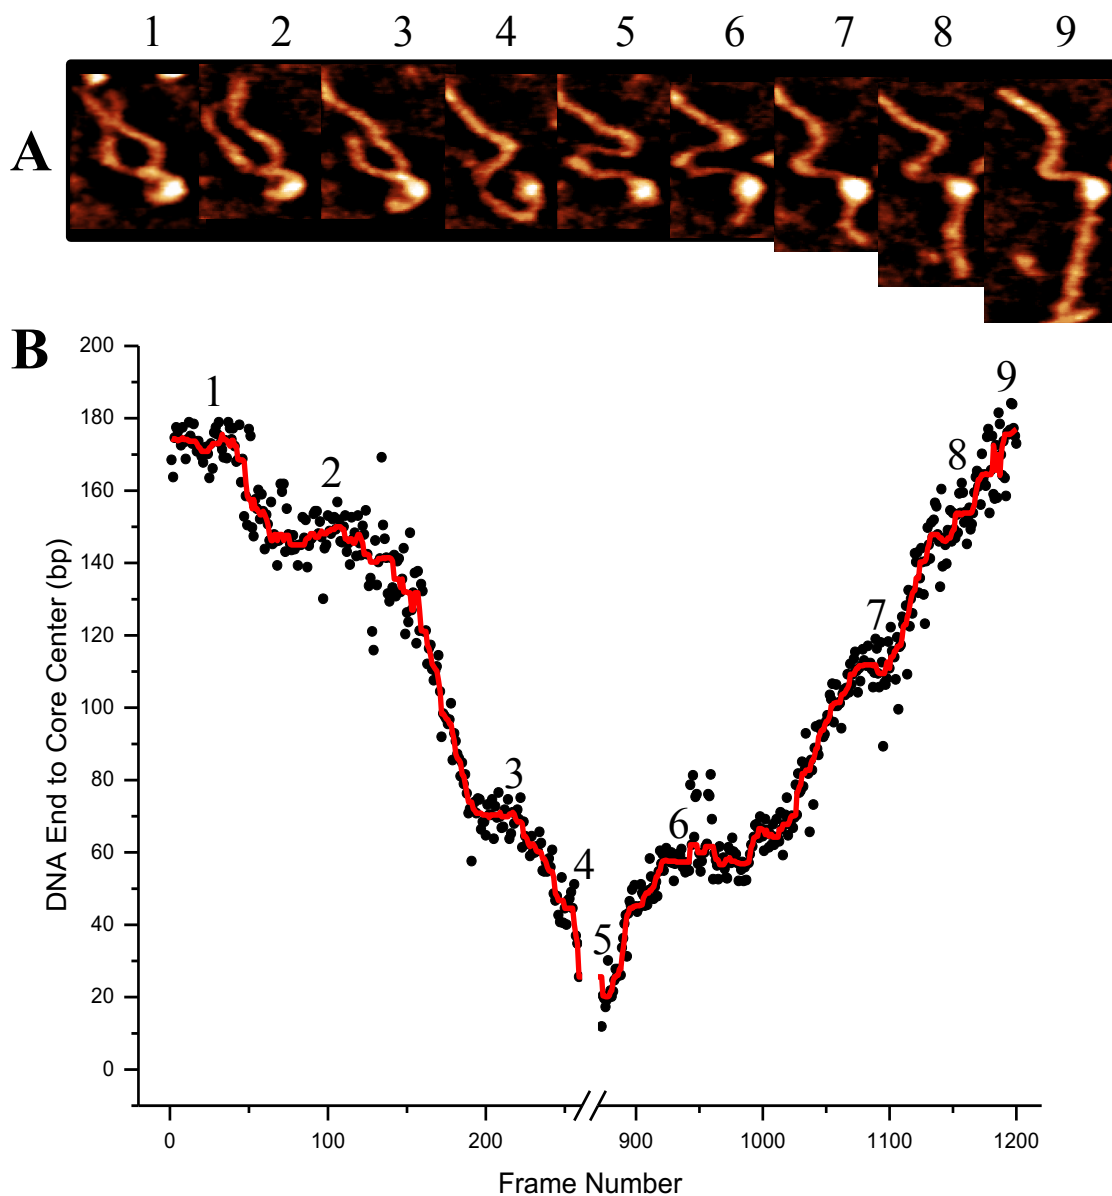

592

593

594 **Figure 4.** Nucleosome translocation is reversible along a DNA substrate. (A) Images of the forward (1-4) and  
595 reverse (5-9) translocation of a nucleosome core particle. Forward movement of the complex appears to be  
596 achieved via a corkscrew motion of the DNA as best visualized in Movie S4. The reverse movement is of a less  
597 wrapped complex and ends up at about the same position on the DNA substrate as where it began (Movie S5).  
598 The white arrows in images 1 and 6 point to the arm length for which the contour length measurements are  
599 shown in (B) where the distance was measured from the end of that arm to the center of the core particle for  
600 every frame of the video. Frames between ~250 and ~850 were excluded because the core remained at the end  
601 of the DNA substrate (as seen in image 5) for this time and no translocation took place. Black circles represent  
602 the data points and the red line is a moving median. Sliding was observed for a total of 6 particles from the 52  
603 particles imaged.

604

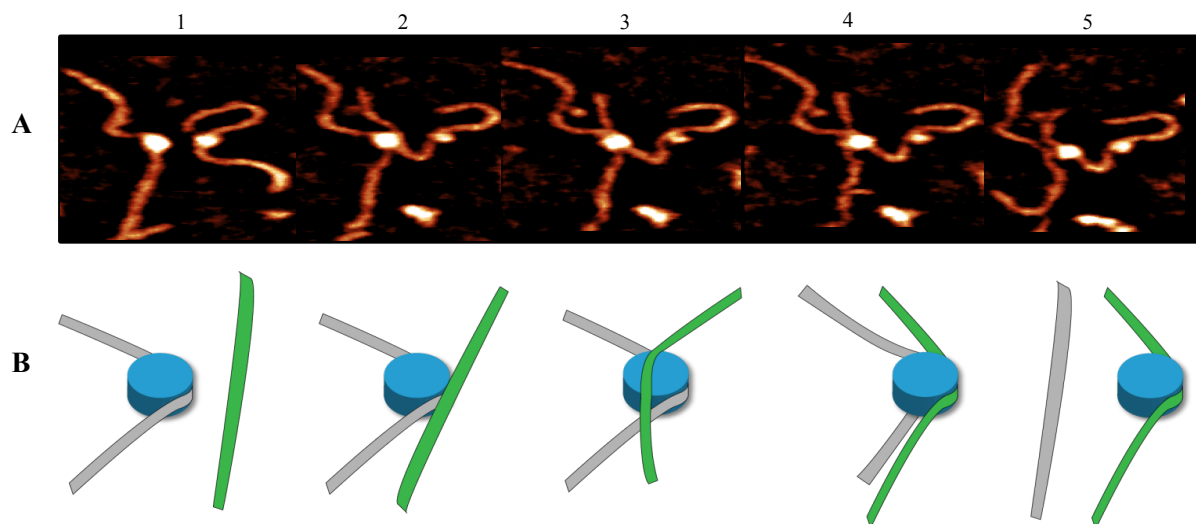

605

606

607 **Figure 5.** The stable CENP-A histone core is capable of spontaneous inter-strand transfer. (A) HS-AFM images  
608 depicting the transfer of a partially wrapped CENP-A containing histone core from one strand to another as seen  
609 in Movie S6 and depicted in schematic (B). Image one shows the parent strand (grey) on the left is partly  
610 wrapped with the histone core (blue) free from interaction with the acceptor strand (green) on the right (image  
611 and schematic 1). Interaction of the acceptor strand (image and schematic 2) soon leads to a histone/DNA  
612 complex containing both parent and acceptor strands (image and schematic 3). Within a second of this dual  
613 substrate complex, the acceptor strand took full control of the core with the parent strand only partly interacting  
614 (image and schematic 4) until the acceptor/core complex is completely free from interaction with the parent  
615 substrate (image and schematic 5).

616

617

618

619

620

621

622

623

624
